# Supplementary material for: Development of machine learning support for reading whole body diffusion-weighted MRI (WB-MRI) in myeloma for the detection and quantification of the extent of disease before and after treatment (MALIMAR): protocol for a cross-sectional diagnostic test accuracy study
Source: PubMed Central journal article supplement — BMJ Open. 2022 Oct 5;12(10):e067140. doi: 10.1136/bmjopen-2022-067140 (PMC9535185; doi:10.1136/bmjopen-2022-067140), 2022-10-05
Supplement: bmjopen-2022-067140supp002.pdf [file bmjopen-2022-067140supp002.pdf]

| Participant Type   | Study name | Site          | MRI Machine Name | Sequences acquired                                                                                                                                        |
|--------------------|------------|---------------|------------------|-----------------------------------------------------------------------------------------------------------------------------------------------------------|
| Healthy Volunteers | MALIMAR    | Royal Marsden | Siemens Aera     | Haste localiser, Sag T1, T2 whole spine, DWI (B50,600,900 and ADC), fl3d_CAIPi_wb_tra_BH_20 and T2 HASTE Vertex to knees                                  |
| Healthy Volunteers | MALIMAR    | Royal Marsden | Siemens Avanto   | localiser, Sag T1, T2 whole spine, DWI (B50,600,900 and ADC), fl3d_vibe_dixon_TRA_15deg 256_pocS and T2 HASTE Vertex to knees                             |
| Myeloma Patients   | MALIMAR    | Royal Marsden | Siemens Aera     | Haste localiser, Sag T1, T2 whole spine, DWI (B50,600,900 and ADC), fl3d_CAIPi_wb_tra_BH_20 and Vertex to knees                                           |
| Myeloma Patients   | MALIMAR    | Royal Marsden | Siemens Avanto   | localiser, Sag T1, T2 whole spine, DWI (B50,600,900 and ADC), fl3d_vibe_dixon_TRA_15deg 256 Vertex to knees                                               |
| Myeloma Patients   | MALIMAR    | ICHT          | Siemens Aera     | Axial dixon x 4 350 slices each (total: 1400)<br>B 50 248 slices<br>B900 248 slices<br>ADC 248 slices<br>Sag T1 spine 15 slices<br>Sag T2 spine 15 slices |
