# Supplementary material for: Development of machine learning support for reading whole body diffusion-weighted MRI (WB-MRI) in myeloma for the detection and quantification of the extent of disease before and after treatment (MALIMAR): protocol for a cross-sectional diagnostic test accuracy study
Source: PubMed Central journal article supplement — BMJ Open. 2022 Oct 5;12(10):e067140. doi: 10.1136/bmjopen-2022-067140 (PMC9535185; doi:10.1136/bmjopen-2022-067140), 2022-10-05
Supplement: bmjopen-2022-067140supp003.pdf [file bmjopen-2022-067140supp003.pdf]

# MALIMAR Radiology Reads - CRF

## Phase 2

Version 4, 06 September 2021

\* Required

1. Scan ID \*

2. Reader ID \*

3. Round \*

Round 1

Round 2

4. Date of Read \*

Please input date (dd/MM/yyyy)

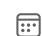

5. Start time of read - Enter in format: HH:MM using 24 hour clock \*

6. Disease status - BONES - Record Number of Active / Focal Lesions \*

|                                                | 0                     | 1 - 4                 | 5 - 10                | >10                   |
|------------------------------------------------|-----------------------|-----------------------|-----------------------|-----------------------|
| Cervical Spine                                 | <input type="radio"/> | <input type="radio"/> | <input type="radio"/> | <input type="radio"/> |
| Dorsal Spine                                   | <input type="radio"/> | <input type="radio"/> | <input type="radio"/> | <input type="radio"/> |
| Lumbar Spine                                   | <input type="radio"/> | <input type="radio"/> | <input type="radio"/> | <input type="radio"/> |
| Pelvis                                         | <input type="radio"/> | <input type="radio"/> | <input type="radio"/> | <input type="radio"/> |
| Long Bones                                     | <input type="radio"/> | <input type="radio"/> | <input type="radio"/> | <input type="radio"/> |
| Skull                                          | <input type="radio"/> | <input type="radio"/> | <input type="radio"/> | <input type="radio"/> |
| Ribs /<br>Clavicles /<br>Sternum /<br>Scapulae | <input type="radio"/> | <input type="radio"/> | <input type="radio"/> | <input type="radio"/> |

7. Disease status - BONES - Record maximum size of Active / Focal lesions  
(mm) \*

|                                                                       | <10mm                 | 10 - 20mm             | >20mm                 | Not<br>Applicable,<br>No Focal<br>lesions<br>seen at this<br>site |
|-----------------------------------------------------------------------|-----------------------|-----------------------|-----------------------|-------------------------------------------------------------------|
| Cervical<br>Spine                                                     | <input type="radio"/> | <input type="radio"/> | <input type="radio"/> | <input type="radio"/>                                             |
| Dorsal spine                                                          | <input type="radio"/> | <input type="radio"/> | <input type="radio"/> | <input type="radio"/>                                             |
| Lumbar spine                                                          | <input type="radio"/> | <input type="radio"/> | <input type="radio"/> | <input type="radio"/>                                             |
| Pelvis                                                                | <input type="radio"/> | <input type="radio"/> | <input type="radio"/> | <input type="radio"/>                                             |
| Long Bones<br>(max. long<br>axis)                                     | <input type="radio"/> | <input type="radio"/> | <input type="radio"/> | <input type="radio"/>                                             |
| Skull                                                                 | <input type="radio"/> | <input type="radio"/> | <input type="radio"/> | <input type="radio"/>                                             |
| Ribs /<br>Clavicles /<br>Sternum /<br>Scapulae<br>(max. long<br>axis) | <input type="radio"/> | <input type="radio"/> | <input type="radio"/> | <input type="radio"/>                                             |

8. Disease Status - BONES - How confident are you in your assessment of  
Active / Focal lesions \*

|                                                | Not at all<br>confident | Some<br>confidence    | Confident             | Very<br>Confident     |
|------------------------------------------------|-------------------------|-----------------------|-----------------------|-----------------------|
| Cervical<br>Spine                              | <input type="radio"/>   | <input type="radio"/> | <input type="radio"/> | <input type="radio"/> |
| Dorsal Spine                                   | <input type="radio"/>   | <input type="radio"/> | <input type="radio"/> | <input type="radio"/> |
| Lumbar Spine                                   | <input type="radio"/>   | <input type="radio"/> | <input type="radio"/> | <input type="radio"/> |
| Pelvis                                         | <input type="radio"/>   | <input type="radio"/> | <input type="radio"/> | <input type="radio"/> |
| Long Bones                                     | <input type="radio"/>   | <input type="radio"/> | <input type="radio"/> | <input type="radio"/> |
| Skull                                          | <input type="radio"/>   | <input type="radio"/> | <input type="radio"/> | <input type="radio"/> |
| Ribs /<br>Clavicles /<br>Sternum /<br>Scapulae | <input type="radio"/>   | <input type="radio"/> | <input type="radio"/> | <input type="radio"/> |

## 9. Disease Status - Record if diffuse disease was present at any of these sites?

\*

|                                                | Yes                   | No                    |
|------------------------------------------------|-----------------------|-----------------------|
| Cervical Spine                                 | <input type="radio"/> | <input type="radio"/> |
| Dorsal Spine                                   | <input type="radio"/> | <input type="radio"/> |
| Lumbar Spine                                   | <input type="radio"/> | <input type="radio"/> |
| Pelvis                                         | <input type="radio"/> | <input type="radio"/> |
| Long Bones                                     | <input type="radio"/> | <input type="radio"/> |
| Skull                                          | <input type="radio"/> | <input type="radio"/> |
| Ribs /<br>Clavicles /<br>Sternum /<br>Scapulae | <input type="radio"/> | <input type="radio"/> |

10. How confident were you in your assessment of diffuse disease at these sites? \*

|                                                | Not at all confident  | Some confidence       | Confident             | Very confident        |
|------------------------------------------------|-----------------------|-----------------------|-----------------------|-----------------------|
| Cervical Spine                                 | <input type="radio"/> | <input type="radio"/> | <input type="radio"/> | <input type="radio"/> |
| Dorsal Spine                                   | <input type="radio"/> | <input type="radio"/> | <input type="radio"/> | <input type="radio"/> |
| Lumbar Spine                                   | <input type="radio"/> | <input type="radio"/> | <input type="radio"/> | <input type="radio"/> |
| Pelvis                                         | <input type="radio"/> | <input type="radio"/> | <input type="radio"/> | <input type="radio"/> |
| Long Bones                                     | <input type="radio"/> | <input type="radio"/> | <input type="radio"/> | <input type="radio"/> |
| Skull                                          | <input type="radio"/> | <input type="radio"/> | <input type="radio"/> | <input type="radio"/> |
| Ribs /<br>Clavicles /<br>Sternum /<br>Scapulae | <input type="radio"/> | <input type="radio"/> | <input type="radio"/> | <input type="radio"/> |

11. Was extramedullary disease present at any site? \*

- Yes
- No

12. If extramedullary disease was present at any site - state location(s) separated by a semi-colon

13. If extramedullary disease was present, what was your level of confidence in assessing this? \*

- Not confident at all
- Some confidence
- Confident
- Very confident
- Not Applicable, no extramedullary disease is seen.

14. Confidence in assessing overall disease status on this scan (i.e. in determining the presence or absence of ANY active disease) \*

- Not confident at all
- Some confidence
- Confident
- Very confident

15. Stop time of read - RECORD IMMEDIATELY AFTER COMPLETING CLINICAL READ - Enter in format: HH:MM using 24 hour clock \*

16. TO BE COMPLETED FOLLOWING THE CLINICAL READ:

Was a Machine Learning Image available \*

- Yes
- No

17. If a Machine Learning 'ML' Image was available, please indicate whether sites were positive for active / focal disease, i.e. was there an ML finding?

|                                       | Highly likely negative on ML | Probably negative on ML | Probably positive on ML | Highly likely positive on ML |
|---------------------------------------|------------------------------|-------------------------|-------------------------|------------------------------|
| Cervical Spine                        | <input type="radio"/>        | <input type="radio"/>   | <input type="radio"/>   | <input type="radio"/>        |
| Dorsal Spine                          | <input type="radio"/>        | <input type="radio"/>   | <input type="radio"/>   | <input type="radio"/>        |
| Lumbar Spine                          | <input type="radio"/>        | <input type="radio"/>   | <input type="radio"/>   | <input type="radio"/>        |
| Pelvis                                | <input type="radio"/>        | <input type="radio"/>   | <input type="radio"/>   | <input type="radio"/>        |
| Long Bones                            | <input type="radio"/>        | <input type="radio"/>   | <input type="radio"/>   | <input type="radio"/>        |
| Skull                                 | <input type="radio"/>        | <input type="radio"/>   | <input type="radio"/>   | <input type="radio"/>        |
| Ribs / Clavicles / Sternum / Scapulae | <input type="radio"/>        | <input type="radio"/>   | <input type="radio"/>   | <input type="radio"/>        |



18. If a Machine Learning 'ML' image was available, please indicate whether sites were positive for diffuse disease, i.e. was there an ML finding?

|                                       | Highly likely negative on ML | Probably negative on ML | Probably positive on ML | Highly likely positive on ML |
|---------------------------------------|------------------------------|-------------------------|-------------------------|------------------------------|
| Cervical Spine                        | <input type="radio"/>        | <input type="radio"/>   | <input type="radio"/>   | <input type="radio"/>        |
| Dorsal Spine                          | <input type="radio"/>        | <input type="radio"/>   | <input type="radio"/>   | <input type="radio"/>        |
| Lumbar Spine                          | <input type="radio"/>        | <input type="radio"/>   | <input type="radio"/>   | <input type="radio"/>        |
| Pelvis                                | <input type="radio"/>        | <input type="radio"/>   | <input type="radio"/>   | <input type="radio"/>        |
| Long Bones                            | <input type="radio"/>        | <input type="radio"/>   | <input type="radio"/>   | <input type="radio"/>        |
| Skull                                 | <input type="radio"/>        | <input type="radio"/>   | <input type="radio"/>   | <input type="radio"/>        |
| Ribs / Clavicles / Sternum / Scapulae | <input type="radio"/>        | <input type="radio"/>   | <input type="radio"/>   | <input type="radio"/>        |

19. Scan Quality: What was the quality of the WB-MRI used for this read? \*

|                 | Good                  | Adequate              | Poor                  |
|-----------------|-----------------------|-----------------------|-----------------------|
| 1. B 900        | <input type="radio"/> | <input type="radio"/> | <input type="radio"/> |
| 2. ADC          | <input type="radio"/> | <input type="radio"/> | <input type="radio"/> |
| 3. T1 sequences | <input type="radio"/> | <input type="radio"/> | <input type="radio"/> |

20. Please enter any specific comments you have on scan quality

21. Reader confirmation: My responses have been accurately reported on this CRF (enter 'yes' if in agreement with this statement) \*

Yes

No

---

This content is neither created nor endorsed by Microsoft. The data you submit will be sent to the form owner.

 Microsoft Forms

# MALIMAR Radiology Reads - CRF

## Phase 3

Version 2, 31 March 2022

\* Required

1. Scan ID Post Treatment Scan (PT) \*

2. Scan ID - Baseline Scan (BL) \*

3. Reader ID \*

4. Phase 3 - Round \*

Round 1

Round 2

3/31/2022

## 5. Date of Read \*



Format: M/d/yyyy

## 6. Start time of read - Enter in format: HH:MM using 24 hour clock \*

## 7. CERVICAL SPINE - Number of Active / Focal Lesions \*

|                | 0                     | 1 - 4                 | 5 - 10                | >10                   |
|----------------|-----------------------|-----------------------|-----------------------|-----------------------|
| Post Treatment | <input type="radio"/> | <input type="radio"/> | <input type="radio"/> | <input type="radio"/> |
| Baseline       | <input type="radio"/> | <input type="radio"/> | <input type="radio"/> | <input type="radio"/> |

## 8. CERVICAL SPINE - Maximum size (mm) of Active / Focal Lesions \*

|                | <10mm                 | 10 - 20mm             | >20mm                 | Not Applicable,<br>No Focal lesions<br>seen at this site |
|----------------|-----------------------|-----------------------|-----------------------|----------------------------------------------------------|
| Post-Treatment | <input type="radio"/> | <input type="radio"/> | <input type="radio"/> | <input type="radio"/>                                    |
| Baseline       | <input type="radio"/> | <input type="radio"/> | <input type="radio"/> | <input type="radio"/>                                    |

## 9. CERVICAL SPINE - Was Diffuse Disease present? \*

|                | Yes                   | No                    |
|----------------|-----------------------|-----------------------|
| Post Treatment | <input type="radio"/> | <input type="radio"/> |
| Baseline       | <input type="radio"/> | <input type="radio"/> |

3/31/2022

## 10. DORSAL SPINE - Number of Active / Focal Lesions \*

|                | 0                     | 1 - 4                 | 5 - 10                | >10                   |
|----------------|-----------------------|-----------------------|-----------------------|-----------------------|
| Post Treatment | <input type="radio"/> | <input type="radio"/> | <input type="radio"/> | <input type="radio"/> |
| Baseline       | <input type="radio"/> | <input type="radio"/> | <input type="radio"/> | <input type="radio"/> |

## 11. DORSAL SPINE - Maximum size (mm) of Active / Focal Lesions \*

|                | <10mm                 | 10 - 20mm             | >20mm                 | Not Applicable,<br>No Focal lesions<br>seen at this site |
|----------------|-----------------------|-----------------------|-----------------------|----------------------------------------------------------|
| Post-Treatment | <input type="radio"/> | <input type="radio"/> | <input type="radio"/> | <input type="radio"/>                                    |
| Baseline       | <input type="radio"/> | <input type="radio"/> | <input type="radio"/> | <input type="radio"/>                                    |

## 12. DORSAL SPINE - Was Diffuse Disease present? \*

|                | Yes                   | No                    |
|----------------|-----------------------|-----------------------|
| Post Treatment | <input type="radio"/> | <input type="radio"/> |
| Baseline       | <input type="radio"/> | <input type="radio"/> |

## 13. LUMBAR SPINE - Number of Active / Focal Lesions \*

|                | 0                     | 1 - 4                 | 5 - 10                | >10                   |
|----------------|-----------------------|-----------------------|-----------------------|-----------------------|
| Post Treatment | <input type="radio"/> | <input type="radio"/> | <input type="radio"/> | <input type="radio"/> |
| Baseline       | <input type="radio"/> | <input type="radio"/> | <input type="radio"/> | <input type="radio"/> |

## 14. LUMBAR SPINE - Maximum size (mm) of Active / Focal Lesions \*

|                | <10mm                 | 10 - 20mm             | >20mm                 | Not Applicable,<br>No Focal lesions<br>seen at this site |
|----------------|-----------------------|-----------------------|-----------------------|----------------------------------------------------------|
| Post-Treatment | <input type="radio"/> | <input type="radio"/> | <input type="radio"/> | <input type="radio"/>                                    |
| Baseline       | <input type="radio"/> | <input type="radio"/> | <input type="radio"/> | <input type="radio"/>                                    |

## 15. LUMBAR SPINE - Was Diffuse Disease present? \*

|                | Yes                   | No                    |
|----------------|-----------------------|-----------------------|
| Post Treatment | <input type="radio"/> | <input type="radio"/> |
| Baseline       | <input type="radio"/> | <input type="radio"/> |

## 16. PELVIS - Number of Active / Focal Lesions \*

|                | 0                     | 1 - 4                 | 5 - 10                | >10                   |
|----------------|-----------------------|-----------------------|-----------------------|-----------------------|
| Post Treatment | <input type="radio"/> | <input type="radio"/> | <input type="radio"/> | <input type="radio"/> |
| Baseline       | <input type="radio"/> | <input type="radio"/> | <input type="radio"/> | <input type="radio"/> |

## 17. PELVIS - Maximum size (mm) of Active / Focal Lesions \*

|                | <10mm                 | 10 - 20mm             | >20mm                 | Not Applicable,<br>No Focal lesions<br>seen at this site |
|----------------|-----------------------|-----------------------|-----------------------|----------------------------------------------------------|
| Post-Treatment | <input type="radio"/> | <input type="radio"/> | <input type="radio"/> | <input type="radio"/>                                    |
| Baseline       | <input type="radio"/> | <input type="radio"/> | <input type="radio"/> | <input type="radio"/>                                    |

## 18. PELVIS - Was Diffuse Disease present? \*

|                | Yes                   | No                    |
|----------------|-----------------------|-----------------------|
| Post Treatment | <input type="radio"/> | <input type="radio"/> |
| Baseline       | <input type="radio"/> | <input type="radio"/> |

## 19. LONG BONES - Number of Active / Focal Lesions \*

|                | 0                     | 1 - 4                 | 5 - 10                | >10                   |
|----------------|-----------------------|-----------------------|-----------------------|-----------------------|
| Post Treatment | <input type="radio"/> | <input type="radio"/> | <input type="radio"/> | <input type="radio"/> |
| Baseline       | <input type="radio"/> | <input type="radio"/> | <input type="radio"/> | <input type="radio"/> |

## 20. LONG BONES - Maximum size (mm) of Active / Focal Lesions \*

|                | <10mm                 | 10 - 20mm             | >20mm                 | Not Applicable,<br>No Focal lesions<br>seen at this site |
|----------------|-----------------------|-----------------------|-----------------------|----------------------------------------------------------|
| Post-Treatment | <input type="radio"/> | <input type="radio"/> | <input type="radio"/> | <input type="radio"/>                                    |
| Baseline       | <input type="radio"/> | <input type="radio"/> | <input type="radio"/> | <input type="radio"/>                                    |

## 21. LONG BONES - Was Diffuse Disease present? \*

|                | Yes                   | No                    |
|----------------|-----------------------|-----------------------|
| Post Treatment | <input type="radio"/> | <input type="radio"/> |
| Baseline       | <input type="radio"/> | <input type="radio"/> |

## 22. SKULL - Number of Active / Focal Lesions \*

|                | 0                     | 1 - 4                 | 5 - 10                | >10                   |
|----------------|-----------------------|-----------------------|-----------------------|-----------------------|
| Post Treatment | <input type="radio"/> | <input type="radio"/> | <input type="radio"/> | <input type="radio"/> |
| Baseline       | <input type="radio"/> | <input type="radio"/> | <input type="radio"/> | <input type="radio"/> |

## 23. SKULL - Maximum size (mm) of Active / Focal Lesions \*

|                | <10mm                 | 10 - 20mm             | >20mm                 | Not Applicable,<br>No Focal lesions<br>seen at this site |
|----------------|-----------------------|-----------------------|-----------------------|----------------------------------------------------------|
| Post-Treatment | <input type="radio"/> | <input type="radio"/> | <input type="radio"/> | <input type="radio"/>                                    |
| Baseline       | <input type="radio"/> | <input type="radio"/> | <input type="radio"/> | <input type="radio"/>                                    |

## 24. SKULL - Was Diffuse Disease present? \*

|                | Yes                   | No                    |
|----------------|-----------------------|-----------------------|
| Post Treatment | <input type="radio"/> | <input type="radio"/> |
| Baseline       | <input type="radio"/> | <input type="radio"/> |

## 25. RIBS / CLAVICLES / STERNUM / SCAPULAE - Number of Active / Focal Lesions \*

|                | 0                     | 1 - 4                 | 5 - 10                | >10                   |
|----------------|-----------------------|-----------------------|-----------------------|-----------------------|
| Post Treatment | <input type="radio"/> | <input type="radio"/> | <input type="radio"/> | <input type="radio"/> |
| Baseline       | <input type="radio"/> | <input type="radio"/> | <input type="radio"/> | <input type="radio"/> |



## 26. RIBS / CLAVICLES / STERNUM / SCAPULAE - Maximum size (mm) of Active / Focal Lesions \*

|                | <10mm                 | 10 - 20mm             | >20mm                 | Not Applicable,<br>No Focal lesions<br>seen at this site |
|----------------|-----------------------|-----------------------|-----------------------|----------------------------------------------------------|
| Post-Treatment | <input type="radio"/> | <input type="radio"/> | <input type="radio"/> | <input type="radio"/>                                    |
| Baseline       | <input type="radio"/> | <input type="radio"/> | <input type="radio"/> | <input type="radio"/>                                    |

## 27. RIBS / CLAVICLES / STERNUM / SCAPULAE - Was Diffuse Disease present? \*

|                | Yes                   | No                    |
|----------------|-----------------------|-----------------------|
| Post Treatment | <input type="radio"/> | <input type="radio"/> |
| Baseline       | <input type="radio"/> | <input type="radio"/> |

## 28. Was extramedullary disease present at any site? \*

- Yes
- No

## 29. If extramedullary disease was present at any site - state location(s) separated by a semi-colon

30. If extramedullary disease was present, what was your level of confidence in assessing this? \*

- Not confident at all
- Some confidence
- Confident
- Very confident
- Not Applicable, no extramedullary disease is seen.

31. OVERALL RESPONSE - Change in Disease Status (Baseline - Post-Treatment) \*

|                   | Complete Response     | Partial Response      | Stable Disease        | Disease Progression   |
|-------------------|-----------------------|-----------------------|-----------------------|-----------------------|
| Response category | <input type="radio"/> | <input type="radio"/> | <input type="radio"/> | <input type="radio"/> |

32. OVERALL RESPONSE - CONFIDENCE - How confident were you in assessing overall response? \*

|                     | Not at all confident  | Some confidence       | Confident             | Very confident        |
|---------------------|-----------------------|-----------------------|-----------------------|-----------------------|
| Confidence category | <input type="radio"/> | <input type="radio"/> | <input type="radio"/> | <input type="radio"/> |

33. Stop time of read - RECORD IMMEDIATELY AFTER COMPLETING CLINICAL READ - Enter in format: HH:MM using 24 hour clock \*

## 34. TO BE COMPLETED FOLLOWING THE CLINICAL READ:

Was a Machine Learning Image available \*

 Yes No

## 35. If Machine Learning 'ML' Images were available, please indicate category of response suggested by ML

|                   | Complete Response     | Partial Response      | Stable Disease        | Progressive Disease   |
|-------------------|-----------------------|-----------------------|-----------------------|-----------------------|
| Response category | <input type="radio"/> | <input type="radio"/> | <input type="radio"/> | <input type="radio"/> |

## 36. Scan Quality: What was the quality of the WB-MRI used for this read? \*

|                 | Good                  | Adequate              | Poor                  |
|-----------------|-----------------------|-----------------------|-----------------------|
| 1. B 900        | <input type="radio"/> | <input type="radio"/> | <input type="radio"/> |
| 2. ADC          | <input type="radio"/> | <input type="radio"/> | <input type="radio"/> |
| 3. T1 sequences | <input type="radio"/> | <input type="radio"/> | <input type="radio"/> |

## 37. Please enter any specific comments you have on scan quality

38. Reader confirmation: My responses have been accurately reported on this CRF (enter 'yes' if in agreement with this statement) \*

Yes

No

---

This content is neither created nor endorsed by Microsoft. The data you submit will be sent to the form owner.

 Microsoft Forms
