# Supplementary material for: Development of machine learning support for reading whole body diffusion-weighted MRI (WB-MRI) in myeloma for the detection and quantification of the extent of disease before and after treatment (MALIMAR): protocol for a cross-sectional diagnostic test accuracy study
Source: PubMed Central journal article supplement — BMJ Open. 2022 Oct 5;12(10):e067140. doi: 10.1136/bmjopen-2022-067140 (PMC9535185; doi:10.1136/bmjopen-2022-067140), 2022-10-05
Supplement: bmjopen-2022-067140supp004.pdf [file bmjopen-2022-067140supp004.pdf]

**Supplementary S4 – MALIMAR Amendments**

| <b>No. and Type of Amendment</b> | <b>Date approved</b> | <b>Brief Details of amendment</b>                  |
|----------------------------------|----------------------|----------------------------------------------------|
| 1. Non-substantial               | 25/06/2018           | Protocol administrative updates                    |
| 2. Non-substantial               | 15/01/2019           | Communications to HVs                              |
| 3. Non-substantial               | 19/03/2019           | Update on scan numbers for protocol                |
| 4. Non-substantial               | 16/10/2019           | Addition of ICHT site                              |
| 5. Non-substantial               | 28/06/2019           | Extension of project time-line and uplift in costs |
